# Supplementary material for: Cloud condensation nuclei (CCN) activity and oxygen-to-carbon elemental ratios following thermodenuder treatment of organic particles grown by α-pinene ozonolysis
Source: Royal Society of Chemistry journal article supplement (doi:10.1039/c1cp20253g), 2011-01-01
Supplement: c1cp20253g.pdf [file c1cp20253g.pdf]

**Figure S1.** Organic volume fraction remaining ( $\phi_V$ ) for increasing thermodenuder temperature. Measurements were made using the SMPS. The organic material was prepared by the ozonolysis of  $\alpha$ -pinene. Lines are shown to guide the eye. The values of  $M_{org}$  shown in the figure legend and measured by the AMS are the mass concentrations prior to thermodenuder treatment.

**Figure S2.** Unit-mass-resolution organic mass spectra for the four poles of the study's experimental conditions. These poles were the lowest and highest  $M_{org}$  of the study, with experiments in each case using the thermodenuder set to 100 °C or alternatively bypassing the thermodenuder .

**Figure S3.** Dependence of (a)  $m/z$  44, (b)  $m/z$  43, and (c)  $m/z$  55 on  $M_{org}$ . Results are shown for different values of  $M_{org}$  measured after heat treatment. The lines are shown to guide the eye.

| Experi-<br>ment<br>number | $\alpha$ -pine-<br>ne<br>(ppb) <sup>a</sup> | $M_{org}(T)$ ( $\mu\text{g m}^{-3}$ ) |       |       |       |        | $K_{org}$<br>(25 °C, $S$ ) |       | $K_{org}$<br>(60 °C, $S$ ) |       | $K_{org}$<br>(80 °C, $S$ ) |       | $K_{org}$<br>(100 °C, $S$ ) |       |
|---------------------------|---------------------------------------------|---------------------------------------|-------|-------|-------|--------|----------------------------|-------|----------------------------|-------|----------------------------|-------|-----------------------------|-------|
|                           |                                             | Bypass                                | 25 °C | 60 °C | 80 °C | 100 °C | 0.2%                       | 0.3%  | 0.2%                       | 0.3%  | 0.2%                       | 0.3%  | 0.2%                        | 0.3%  |
| 1                         | 8                                           | 1.4                                   | 0.9   | 0.8   | 0.7   | 0.5    | 0.104 <sup>b</sup>         | 0.103 | 0.107                      | 0.105 | 0.105                      | 0.105 | 0.105                       | 0.102 |
| 2                         | 24                                          | 5.7                                   | 3.9   | 3.4   | 2.6   | 2.0    | 0.100                      | 0.096 | 0.098                      | 0.098 | 0.097                      | 0.094 | 0.095                       | 0.091 |
| 3                         | 32                                          | 9.5                                   | 6.4   | 5.5   | 4.4   | 3.2    | 0.106                      | 0.109 | 0.104                      | 0.098 | 0.096                      | 0.094 | 0.087                       | 0.085 |
| 4                         | 60                                          | 25                                    | 17    | 15    | 12    | 9.0    | 0.102                      | 0.099 | 0.099                      | 0.098 | 0.094                      | 0.094 | 0.084                       | 0.080 |
| 5                         | 80                                          | 37                                    | 25    | 22    | 17    | 13     | 0.105                      | 0.103 | 0.101                      | 0.102 | 0.095                      | 0.097 | 0.079                       | 0.079 |

**Table S1.** List of experiments and corresponding results. <sup>a</sup>The  $\alpha$ -pinene concentration was calculated from the injection rate.

<sup>b</sup>Corresponding diameter ranges are around 135 nm ( $S = 0.2\%$ , 25 °C) and 100 nm ( $S = 0.3\%$ , 25 °C), respectively

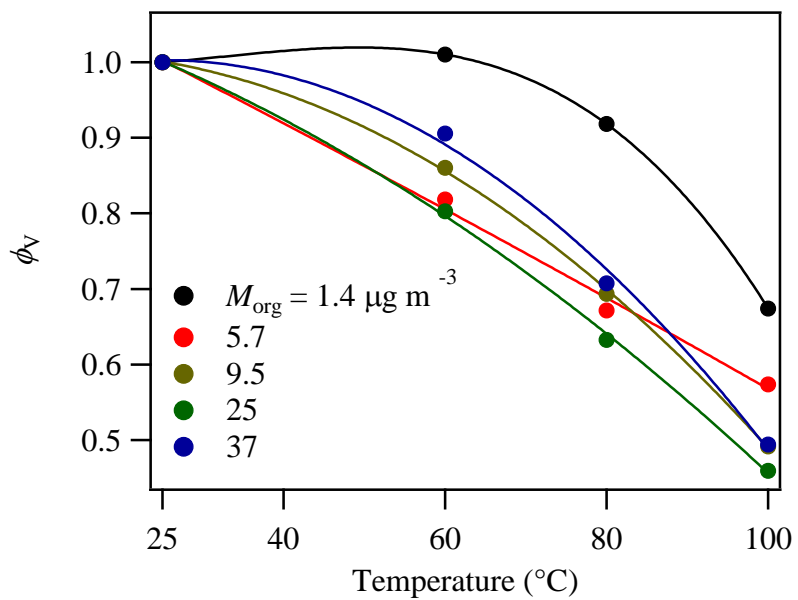

Figure S1

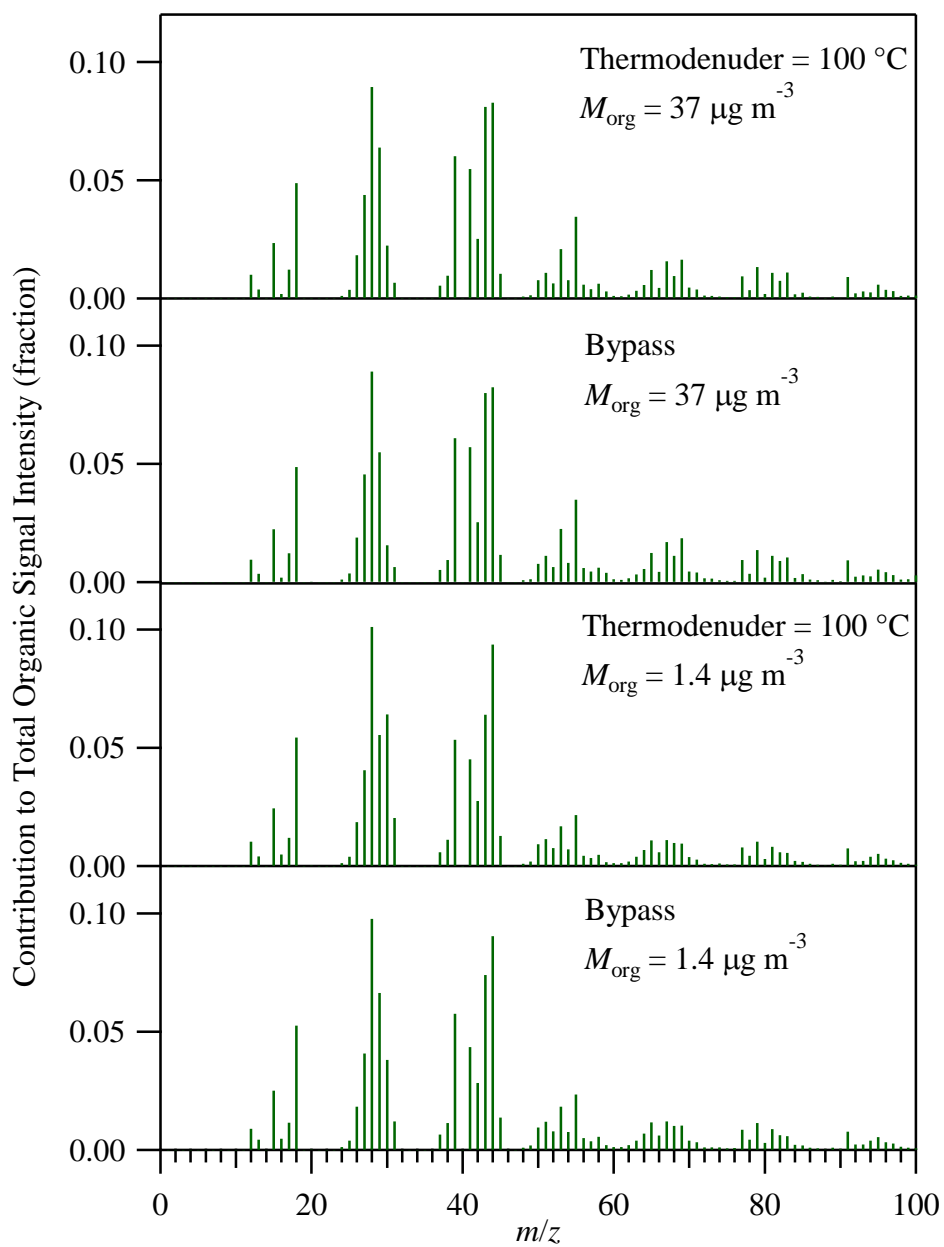

Figure S2

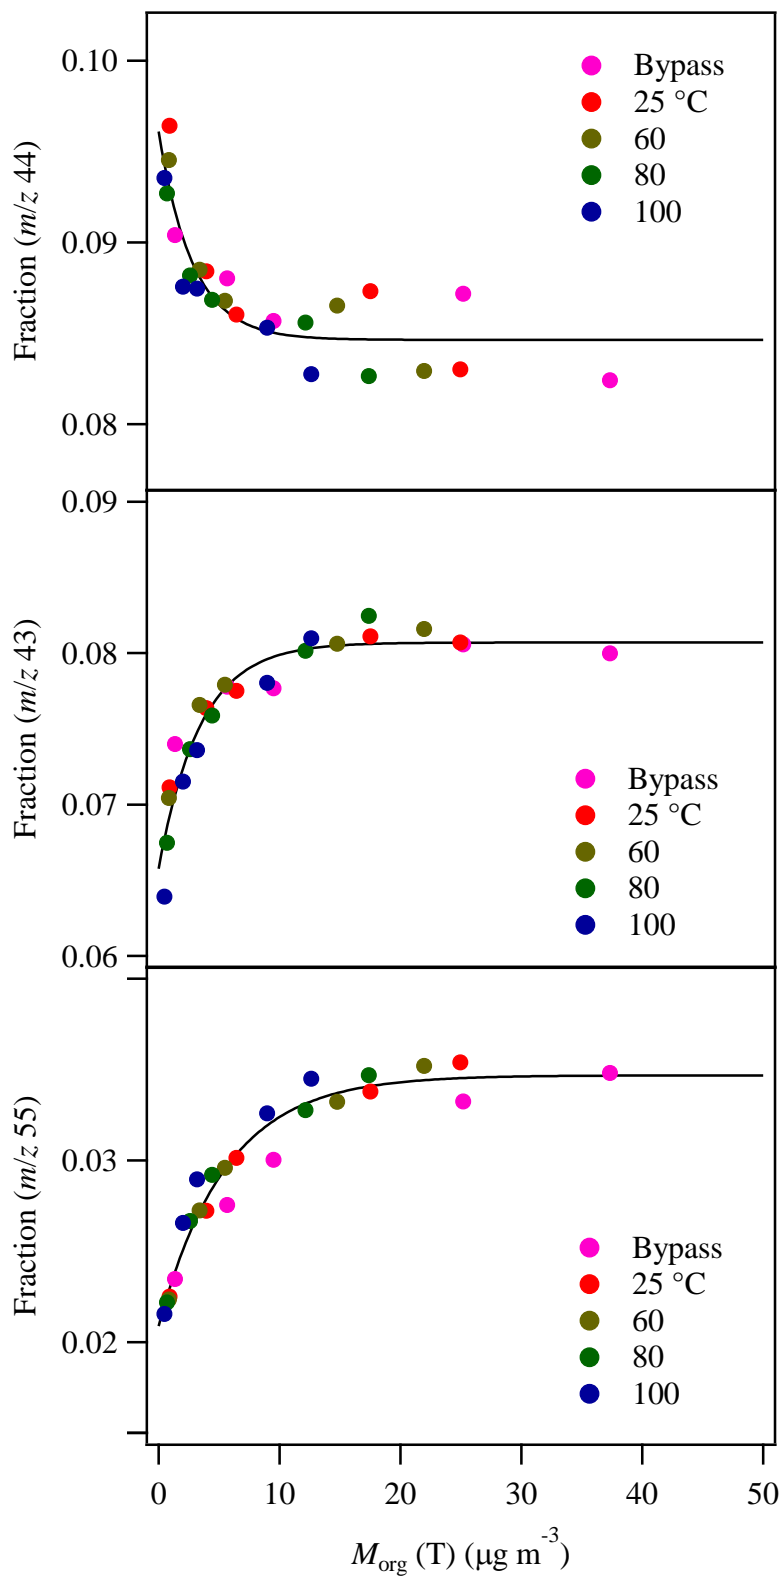

Figure S3
